# Supplementary material
Source: PubMed Central journal article supplement (PMC3702311)
Supplement: f-69-00712-sup3.pdf [file f-69-00712-sup3.pdf]

**Supplementary Table S1.** Chemicals, and the associated concentration information, which were found in the 321 crystallization conditions extracted from the crystallization communications published 2012. Only the 73 chemicals that were found more than once are shown in the table. There were another 71 chemicals that were found only once in the conditions parsed from these papers.

| Frequency | Chemical                          | UNITS | Most common concentration | Minimum concentration | Maximum concentration | Standard deviation in concentration |
|-----------|-----------------------------------|-------|---------------------------|-----------------------|-----------------------|-------------------------------------|
| 79        | POLYETHYLENE GLYCOL 3350          | W/V   | 20.0000                   | 0.7500                | 28.0000               | 7.3628                              |
| 64        | SODIUM HEPES AMMONIUM             | M     | 0.1000                    | 0.0200                | 0.1000                | 0.0453                              |
| 61        | SULFATE                           | M     | 0.2000                    | 0.0500                | 3.6000                | 1.0064                              |
| 43        | TRIS CHLORIDE                     | M     | 0.1000                    | 0.0200                | 0.8500                | 0.3338                              |
| 41        | POLYETHYLENE GLYCOL 4000          | W/V   | 20.0000                   | 8.0000                | 30.0000               | 7.2155                              |
| 40        | SODIUM CITRATE - CITRIC ACID      | M     | 0.1000                    | 0.0100                | 1.6000                | 0.6993                              |
| 36        | SODIUM ACETATE MAGNESIUM          | M     | 0.1000                    | 0.0500                | 2.8000                | 0.8966                              |
| 33        | CHLORIDE                          | M     | 0.2000                    | 0.0010                | 0.4000                | 0.1348                              |
| 29        | MES                               | M     | 0.1000                    | 0.0400                | 0.5000                | 0.1673                              |
| 26        | POLYETHYLENE GLYCOL 8000          | W/V   | 30.0000                   | 1.0000                | 30.0000               | 8.3007                              |
| 24        | GLYCEROL                          | W/V   | 6.3000                    | 2.2680                | 31.5000               | 10.0147                             |
| 23        | SODIUM CHLORIDE                   | M     | 0.2000                    | 0.0060                | 3.0000                | 1.0390                              |
| 22        | BIS-TRIS                          | M     | 0.1000                    | 0.0500                | 0.1000                | 0.0241                              |
| 22        | POLYETHYLENE GLYCOL 400           | W/V   | 2.2520                    | 2.0000                | 34.9060               | 11.4205                             |
| 21        | POLYETHYLENE GLYCOL 6000          | W/V   | 14.0000                   | 5.0000                | 42.0000               | 12.1977                             |
| 21        | LITHIUM SULFATE SODIUM            | M     | 0.2000                    | 0.0500                | 1.8000                | 0.5530                              |
| 20        | CACODYLATE                        | M     | 0.1000                    | 0.0200                | 0.1000                | 0.0386                              |
| 18        | 2-METHYL-2,4-PENTANEDIOL AMMONIUM | W/V   | 4.6270                    | 1.8508                | 46.2700               | 14.8432                             |
| 16        | ACETATE                           | M     | 0.2000                    | 0.0100                | 0.3500                | 0.1005                              |
| 14        | BIS-TRIS PROPANE                  | M     | 0.1000                    | 0.0001                | 0.1000                | 0.0431                              |
| 12        | 2-PROPANOL                        | W/V   | 7.8550                    | 0.6011                | 15.7100               | 4.5530                              |
| 11        | CALCIUM CHLORIDE                  | M     | 0.2000                    | 0.0080                | 0.4000                | 0.1445                              |
| 10        | ETHYLENE GLYCOL POLYETHYLENE      | V/V   | 5.0000                    | 5.0000                | 45.0000               | 14.5204                             |
| 10        | GLYCOL 1000 POLYETHYLENE          | W/V   | 44.8000                   | 5.0000                | 44.8000               | 12.6858                             |
| 9         | GLYCOL MONOMETHYL ETHER 2000      | W/V   | 1.0000                    | 1.0000                | 30.0000               | 8.6312                              |
| 9         | POTASSIUM SODIUM TARTRATE         | M     | 0.2000                    | 0.0250                | 1.0000                | 0.3356                              |
| 9         | FORMATE                           | M     | 0.2000                    | 0.1600                | 4.0000                | 1.4258                              |
| 8         | IMIDAZOLE LITHIUM                 | M     | 0.1000                    | 0.0290                | 0.1000                | 0.0297                              |
| 7         | CHLORIDE                          | M     | 1.0000                    | 0.2000                | 1.0000                | 0.3765                              |
| 7         | TACSIMATE POTASSIUM               | V/V   | 5.0000                    | 2.0000                | 45.0000               | 15.7116                             |
| 7         | CHLORIDE MAGNESIUM                | M     | 0.2000                    | 0.0500                | 0.3000                | 0.0875                              |
| 7         | SULFATE                           | M     | 0.2000                    | 0.0050                | 1.6000                | 0.5574                              |
| 6         | SPERMINE                          | M     | 0.0060                    | 0.0005                | 0.0130                | 0.0043                              |
| 6         | MAGNESIUM                         | M     | 0.1000                    | 0.0050                | 0.1000                | 0.0367                              |

|   |                                                           |     |         |         |         |         |
|---|-----------------------------------------------------------|-----|---------|---------|---------|---------|
|   | ACETATE                                                   |     |         |         |         |         |
| 6 | POLYETHYLENE<br>GLYCOL<br>MONOMETHYL<br>ETHER 5000        | W/V | 12.0000 | 10.0000 | 30.0000 | 7.1134  |
| 6 | POLYETHYLENE<br>GLYCOL 20000                              | W/V | 10.0000 | 10.0000 | 15.0000 | 1.9003  |
| 6 | POLYETHYLENE<br>GLYCOL 1500                               | W/V | 25.0000 | 20.0000 | 25.0000 | 2.6300  |
| 4 | CHES<br>SODIUM<br>PHOSPHATE                               | M   | 0.1000  | 0.1000  | 0.1200  | 0.0112  |
| 4 | CALCIUM ACETATE<br>TRI-AMMONIUM<br>CITRATE                | M   | 0.1700  | 0.1700  | 0.3250  | 0.0652  |
| 4 | POTASSIUM<br>THIOCYANATE<br>MANGANESE (II)<br>CHLORIDE    | M   | 0.2000  | 0.1000  | 0.2000  | 0.0428  |
| 3 | GALACTOSE<br>SUCCINATE-<br>PHOSPHATE-<br>GLYCINE          | M   | 0.0010  | 0.0001  | 0.0010  | 0.0004  |
| 3 | POTASSIUM<br>PHOSPHATE-<br>SODIUM<br>PHOSPHATE            | M   | 0.2500  | 0.2500  | 36.0320 | 18.8588 |
| 3 | POLYETHYLENE<br>GLYCOL 300                                | W/V | 10.0000 | 0.1000  | 10.0000 | 5.2178  |
| 3 | TCEP                                                      | M   | 1.2000  | 0.0600  | 1.2000  | 0.5282  |
| 3 | SODIUM IODIDE                                             | M   | 35.4375 | 35.4375 | 45.0000 | 3.9052  |
| 3 | ETHANOL                                                   | W/V | 0.0010  | 0.0010  | 0.1000  | 0.0447  |
| 3 | DITHIOTHREITOL                                            | M   | 0.1300  | 0.0300  | 0.1400  | 0.0497  |
| 3 | POLYETHYLENE<br>GLYCOL 10000                              | W/V | 11.0502 | 7.8930  | 12.0000 | 1.7555  |
| 3 | POLYETHYLENE<br>GLYCOL 600                                | W/V | 0.0050  | 0.0010  | 0.0050  | 0.0021  |
| 3 | POLYETHYLENE<br>GLYCOL<br>MONOMETHYL<br>ETHER 550         | W/V | 17.0000 | 17.0000 | 20.0000 | 1.2472  |
| 3 | POLYETHYLENE<br>GLYCOL 2000                               | W/V | 28.0000 | 20.1600 | 41.0000 | 8.5944  |
| 3 | SODIUM MES                                                | M   | 20.0000 | 20.0000 | 49.2300 | 12.4148 |
| 3 | SERINE<br>POTASSIUM<br>PHOSPHATE<br>PHOSPHATE-<br>CITRATE | M   | 42.0000 | 12.0000 | 42.0000 | 12.3918 |
| 3 | GUANIDINE<br>HYDROCHLORIDE                                | M   | 0.1000  | 0.1000  | 0.1000  | 0.0000  |
| 3 | SODIUM<br>FLUORIDE                                        | M   | 0.1250  | 0.0200  | 0.1250  | 0.0442  |
| 2 | POLYETHYLENE<br>GLYCOL 3000<br>AMMONIUM<br>CHLORIDE       | M   | 1.3400  | 0.4000  | 1.3400  | 0.4954  |
| 2 | MES-IMIDAZOLE<br>SODIUM<br>MALONATE                       | M   | 0.1000  | 0.1000  | 0.2400  | 0.0700  |
| 2 | UREA<br>N-OCTYL-B-D-<br>GLUCOPYRANOSID<br>E               | M   | 0.0200  | 0.0100  | 0.0200  | 0.0050  |
| 2 | TRIMETHYLAMINE<br>N-OXIDE                                 | W/V | 0.5000  | 0.0050  | 0.5000  | 0.2475  |
| 2 | SPERMIDINE                                                | W/V | 15.0200 | 3.0000  | 15.0200 | 6.0100  |
| 2 |                                                           | M   | 0.0020  | 0.0020  | 0.0100  | 0.0040  |

|   |                    |   |        |        |        |        |
|---|--------------------|---|--------|--------|--------|--------|
| 2 | SODIUM THIOCYANATE | M | 0.2000 | 0.1820 | 0.2000 | 0.0090 |
| 2 | AMMONIUM PHOSPHATE | M | 0.5000 | 0.2000 | 0.5000 | 0.1500 |
| 2 | SODIUM SUCCINATE   | M | 1.0000 | 0.0500 | 1.0000 | 0.4750 |
| 2 | POTASSIUM ACETATE  | M | 2.0000 | 0.4000 | 2.0000 | 0.8000 |

**Supplementary Table S2.** Buffer chemicals, and the associated pH information, which were found in the 321 crystallization conditions extracted from the crystallization communications published 2012.

| Frequency | Buffer chemical                      | Average pH | Most common pH | Minimum pH | Maximum pH | Standard Deviation of pH |
|-----------|--------------------------------------|------------|----------------|------------|------------|--------------------------|
| 63        | SODIUM HEPES                         | 7.37       | 7.5            | 6          | 8.5        | 0.54                     |
| 41        | TRIS CHLORIDE                        | 8.17       | 8.5            | 7          | 9          | 0.53                     |
| 33        | SODIUM CITRATE - CITRIC ACID         | 5.24       | 5              | 3.5        | 7.8        | 0.79                     |
| 31        | MES                                  | 6.16       | 6.5            | 5.5        | 7          | 0.47                     |
| 26        | SODIUM ACETATE                       | 4.67       | 4.6            | 4          | 5.5        | 0.45                     |
| 23        | BIS-TRIS                             | 5.94       | 5.5            | 5.5        | 7          | 0.52                     |
| 20        | SODIUM CACODYLATE                    | 6.29       | 6.5            | 4.5        | 7          | 0.77                     |
| 13        | BIS-TRIS PROPANE                     | 7.25       | 6.5            | 5.5        | 8.8        | 0.95                     |
| 5         | IMIDAZOLE                            | 7.44       | 8              | 6.2        | 8          | 0.83                     |
| 4         | CHES                                 | 9.15       | 9.5            | 8.6        | 9.5        | 0.39                     |
| 3         | SUCCINATE-PHOSPHATE-GLYCINE          | 8.08       | 9.15           | 6          | 9.15       | 1.47                     |
| 3         | SODIUM MES                           | 6.28       | 6.75           | 6          | 6.75       | 0.33                     |
| 3         | PHOSPHATE-CITRATE                    | 4.20       | 4.2            | 4.2        | 4.2        | 0.00                     |
| 3         | POTASSIUM PHOSPHATE-SODIUM PHOSPHATE | 6.50       | 7              | 5.5        | 7          | 0.79                     |
| 1         | SODIUM SUCCINATE                     | 5.5        | 5.5            | 5.5        | 5.5        | 0.00                     |
| 2         | MES-IMIDAZOLE                        | 6.50       | 6.5            | 6.5        | 6.5        | 0.00                     |
| 1         | POTASSIUM MES                        | 5.90       | 5.9            | 5.9        | 5.9        | 0.00                     |
| 1         | SODIUM MALONATE                      | 4.00       | 4              | 4          | 4          | 0.00                     |
| 1         | CAPS                                 | 10.00      | 10             | 10         | 10         | 0.00                     |
| 1         | BICINE                               | 9.00       | 9              | 9          | 9          | 0.00                     |
| 1         | ADA                                  | 6.60       | 6.6            | 6.6        | 6.6        | 0.00                     |
| 1         | SODIUM TRICINE                       | 8.40       | 8.4            | 8.4        | 8.4        | 0.00                     |
| 1         | MOPS                                 | 7.00       | 7              | 7          | 7          | 0.00                     |
| 1         | MALATE-MES-TRIS                      | 4.00       | 4              | 4          | 4          | 0.00                     |
